# Supplementary material for: Genome-Wide Association Study Identified Candidate Genes for Alkalinity Tolerance in Rice
Source: MDPI journal article supplement (doi:10.3390/plants12112206), 2023-06-03
Supplement: s1 [file s1]

**Table S1.** Phenotypic performance of rice genotypes in the control environment at the seedling stage.

| <b>Trait<sup>a</sup></b> | <b>Min</b> | <b>Max</b> | <b>Mean</b> | <b>Std_dev</b> | <b>RIL<br/>Pr &gt; Fc<sup>b</sup></b> | <b>Heritability</b> |
|--------------------------|------------|------------|-------------|----------------|---------------------------------------|---------------------|
| AKT                      | 1.0        | 2.0        | 1.2         | 0.43           | 0.22 <sup>ns</sup>                    | 0.92                |
| SHL                      | 25.88      | 70.37      | 45.47       | 7.66           | 0.37 <sup>ns</sup>                    | 0.86                |
| RTL                      | 11.54      | 80.78      | 26.99       | 5.20           | 0.29 <sup>ns</sup>                    | 0.71                |
| RSR                      | 0.21       | 2.10       | 0.61        | 0.17           | 0.16 <sup>ns</sup>                    | 0.83                |
| Inv_FW                   | 0.39       | 3.66       | 1.40        | 0.78           | 0.38 <sup>ns</sup>                    | 0.90                |
| log_DW                   | -1.3       | 0.17       | -0.23       | 0.28           | 0.28 <sup>ns</sup>                    | 0.79                |
| SNC                      | 120.15     | 976.80     | 518.36      | 151.98         | 0.32 <sup>ns</sup>                    | 0.81                |
| SKC                      | 665.86     | 1304.96    | 998.31      | 128.16         | 0.42 <sup>ns</sup>                    | 0.91                |
| SNK                      | 0.11       | 1.03       | 0.52        | 0.17           | 0.52 <sup>ns</sup>                    | 0.86                |

<sup>a</sup>AKT, alkalinity tolerance score; SHL, shoot length; RTL, root length; RSR, root-to-shoot ratio; inv\_FW, inverse fresh weight; log\_DW, log dry weight; SNC, shoot Na<sup>+</sup> concentration; SKC, shoot K<sup>+</sup> concentration; SNK, shoot Na<sup>+</sup>: K<sup>+</sup> ratio.

<sup>b</sup>genotypic difference among lines.

<sup>ns</sup>non-significance differences between the means of genotypes

Fc – Analysis of Variance test

**Table S2.** Eigen value, variance, and cumulative variance (%) of principal components for nine morphological and physiological traits in the rice genotypes under alkaline stress.

| Principal Components | Eigen values | Variance % | Cummulative Variance % |
|----------------------|--------------|------------|------------------------|
| PC 1                 | 3.43         | 38.16      | 38.16                  |
| PC 2                 | 1.99         | 22.07      | 60.22                  |
| PC 3                 | 1.68         | 18.63      | 78.85                  |
| PC 4                 | 1.04         | 11.57      | 90.42                  |
| PC 5                 | 0.7          | 7.75       | 98.18                  |
| PC 6                 | 0.08         | 0.86       | 99.04                  |
| PC 7                 | 0.04         | 0.44       | 99.48                  |
| PC 8                 | 0.02         | 0.27       | 99.75                  |
| PC 9                 | 0.02         | 0.25       | 100                    |

PC, Principal components.

**Table S3.** Eigen vectors and eigen values of the principal components for nine morpho-physiological traits of rice genotypes evaluated for alkalinity tolerance at the seedling stage.

|        | PC 1   | PC 2   | PC 3   | PC 4   | PC 5   | PC 6   | PC 7   | PC 8   | PC 9   |
|--------|--------|--------|--------|--------|--------|--------|--------|--------|--------|
| AKT    | -0.932 | 0.019  | -0.25  | 0.06   | -0.141 | 0.203  | 0.015  | -0.049 | -0.031 |
| SHL    | 0.22   | -0.595 | -0.517 | -0.561 | -0.084 | -0.003 | -0.006 | -0.054 | 0.07   |
| RTL    | -0.257 | 0.359  | 0.293  | -0.845 | -0.02  | 0.009  | 0.01   | 0.04   | -0.05  |
| RSR    | -0.329 | 0.711  | 0.608  | -0.043 | 0.048  | -0.004 | -0.004 | -0.066 | 0.084  |
| Inv_FW | 0.902  | -0.122 | 0.322  | -0.032 | 0.163  | 0.19   | -0.015 | 0.051  | 0.041  |
| log_DW | 0.929  | -0.069 | 0.267  | -0.045 | 0.152  | 0.006  | 0.035  | -0.099 | -0.072 |
| SNC    | -0.635 | -0.453 | 0.17   | -0.049 | 0.591  | -0.009 | -0.098 | -0.012 | -0.013 |
| SKC    | 0.043  | 0.545  | -0.655 | -0.028 | 0.512  | 0.007  | 0.09   | 0.01   | 0.013  |
| SNK    | -0.491 | -0.689 | 0.507  | 0.022  | 0.079  | -0.015 | 0.141  | 0.014  | 0.018  |

PC, Principal components; AKT, alkalinity tolerance score; SHL, shoot length; RTL, root length; RSR, root-to-shoot ratio; inv\_FW, inverse fresh weight; log\_DW, log dry weight; SNC, shoot Na<sup>+</sup> concentration; SKC, shoot K<sup>+</sup> concentration; SNK, shoot Na<sup>+</sup>:K<sup>+</sup> ratio.

**Table S4.** Mean value of each group identified by cluster analysis for nine morphological and physiological traits in the rice genotypes under alkaline stress at the seedling stage.

| Group <sup>a</sup> | AKT  | SHL   | RTL   | RSR  | log_DW | Inv_FW | SNC     | SKC    | SNK  |
|--------------------|------|-------|-------|------|--------|--------|---------|--------|------|
| 1 (HS)             | 8.11 | 36.30 | 16.43 | 0.46 | 0.06   | -2.09  | 2055.61 | 601.63 | 3.81 |
| 2 (T)              | 3.61 | 38.32 | 15.85 | 0.43 | 0.20   | -1.29  | 1625.55 | 629.25 | 2.72 |
| 3 (HT)             | 1.84 | 38.86 | 15.94 | 0.42 | 0.24   | -0.90  | 1487.09 | 635.27 | 2.49 |
| 4 (MT)             | 5.67 | 38.07 | 16.66 | 0.45 | 0.12   | -1.71  | 1792.92 | 709.92 | 2.59 |
| 5 (S)              | 7    | 33.11 | 18.73 | 0.71 | 0.07   | -1.97  | 1956.05 | 730.70 | 2.68 |

<sup>a</sup>Five different groups identified by cluster analysis: HS, highly susceptible; T, tolerant; HT, highly tolerant; MT, moderately tolerant; S, susceptible. AKT, alkalinity tolerance score; SHL, shoot length; RTL, root length; RSR, root-to-shoot ratio; inv\_FW, inverse fresh weight; log\_DW, log dry weight; SNC, shoot Na<sup>+</sup> concentration; SKC, shoot K<sup>+</sup> concentration; SNK, shoot Na<sup>+</sup>:K<sup>+</sup> ratio.

**Table S5.** List of rice genotypes, source, subspecies category, and the sub-group classification by the software ‘STRUCTURE’.

| Sl. No. | Lines         | Source       | Subspecies      | Subgroup (SG) |
|---------|---------------|--------------|-----------------|---------------|
| 1       | Hasawi        | Saudi Arabia | <i>indica</i>   | SG4           |
| 2       | PSBRC-50      | Philippines  | <i>indica</i>   | SG3           |
| 3       | Roy J         | Louisiana    | <i>japonica</i> | SG1           |
| 4       | CL111         | Louisiana    | <i>japonica</i> | SG1           |
| 5       | Djogolan      | Burkina Faso | <i>indica</i>   | SG5           |
| 6       | Saturn        | Louisiana    | <i>japonica</i> | SG1           |
| 7       | Caloro        | California   | <i>indica</i>   | SG2           |
| 8       | LAH10         | Louisiana    | <i>japonica</i> | SG5           |
| 9       | Cheriviruppu  | India        | <i>indica</i>   | SG5           |
| 10      | Pinkaeo       | Thailand     | <i>indica</i>   | SG4           |
| 11      | CL142         | Louisiana    | <i>japonica</i> | SG1           |
| 12      | CL131         | Louisiana    | <i>japonica</i> | SG1           |
| 13      | LAH10         | Louisiana    | <i>japonica</i> | SG3           |
| 14      | Della         | Louisiana    | <i>japonica</i> | SG1           |
| 15      | JN100         | Louisiana    | <i>japonica</i> | SG2           |
| 16      | Century Rogue | Texas        | <i>japonica</i> | SG1           |
| 17      | Pokkali       | Srilanka     | <i>indica</i>   | SG5           |
| 18      | Dular         | Bangladesh   | <i>indica</i>   | SG2           |
| 19      | Mermentau     | Louisiana    | <i>japonica</i> | SG1           |
| 20      | Cypress       | Louisiana    | <i>japonica</i> | SG1           |
| 21      | Evangeline    | Louisiana    | <i>japonica</i> | SG2           |
| 22      | Trenasse      | Louisiana    | <i>japonica</i> | SG1           |
| 23      | Vegold        | Arkansas     | <i>japonica</i> | SG1           |
| 24      | Pecos         | Texas        | <i>japonica</i> | SG2           |
| 25      | Nona Bokra    | India        | <i>japonica</i> | SG5           |
| 26      | Moroberekan   | Guinea       | <i>japonica</i> | SG2           |
| 27      | Wells         | Arkansas     | <i>japonica</i> | SG1           |
| 28      | JN349         | Louisiana    | <i>japonica</i> | SG2           |
| 29      | Pirogue       | Louisiana    | <i>japonica</i> | SG2           |
| 30      | ChN1264       | Louisiana    | <i>japonica</i> | SG1           |
| 31      | Gold Zenith   | Arkansas     | <i>japonica</i> | SG2           |
| 32      | Skybonnet     | Texas        | <i>japonica</i> | SG1           |
| 33      | LA0802140     | Louisiana    | <i>japonica</i> | SG1           |
| 34      | Nipponbare    | Japan        | <i>japonica</i> | SG2           |
| 35      | Jupiter       | Louisiana    | <i>japonica</i> | SG2           |
| 36      | LA0702085     | Louisiana    | <i>japonica</i> | SG1           |
| 37      | Rexona        | Louisiana    | <i>japonica</i> | SG5           |
| 38      | Toro-2        | Louisiana    | <i>japonica</i> | SG1           |
| 39      | Belle Patna   | Texas        | <i>japonica</i> | SG1           |
| 40      | Tebonnet      | Arkansas     | <i>japonica</i> | SG1           |
| 41      | FL478         | Philippines  | <i>indica</i>   | SG3           |
| 42      | Geumgangbyeon | South Korea  | <i>indica</i>   | SG3           |
| 43      | Neptune       | Louisiana    | <i>japonica</i> | SG2           |
| 44      | CL261         | Louisiana    | <i>japonica</i> | SG2           |
| 45      | Nira          | Louisiana    | <i>japonica</i> | SG1           |

|    |                     |             |                 |     |
|----|---------------------|-------------|-----------------|-----|
| 46 | Mercury             | Louisiana   | <i>japonica</i> | SG2 |
| 47 | BHA1115             | Arkansas    | <i>indica</i>   | SG4 |
| 48 | Vista               | Louisiana   | <i>japonica</i> | SG2 |
| 49 | FL318               | Philippines | <i>Indica</i>   | SG5 |
| 50 | IR 29               | Philippines | <i>indica</i>   | SG2 |
| 51 | Caffey              | Louisiana   | <i>japonica</i> | SG2 |
| 52 | N22                 | India       | <i>indica</i>   | SG4 |
| 53 | Magnolia            | Louisiana   | <i>japonica</i> | SG2 |
| 54 | Lacassine           | Louisiana   | <i>japonica</i> | SG1 |
| 55 | CLPK873             | Louisiana   | <i>japonica</i> | SG3 |
| 56 | TCCP                | Philippines | <i>indica</i>   | SG4 |
| 57 | Cocodrie            | Louisiana   | <i>japonica</i> | SG5 |
| 58 | Templeton           | Arkansas    | <i>japonica</i> | SG1 |
| 59 | Lacrosse            | Louisiana   | <i>japonica</i> | SG1 |
| 60 | Dellrose            | Louisiana   | <i>japonica</i> | SG3 |
| 61 | Nova 66             | Arkansas    | <i>japonica</i> | SG2 |
| 62 | Lotus               | Texas       | <i>japonica</i> | SG1 |
| 63 | IRRI147             | Philippines | <i>indica</i>   | SG2 |
| 64 | R609                | Louisiana   | <i>indica</i>   | SG3 |
| 65 | Taggert             | Arkansas    | <i>japonica</i> | SG5 |
| 66 | Agami               | Egypt       | <i>indica</i>   | SG3 |
| 67 | Sunbonnet           | Louisiana   | <i>japonica</i> | SG1 |
| 68 | Lafitte             | Louisiana   | <i>japonica</i> | SG3 |
| 69 | Bluebelle           | Texas       | <i>japonica</i> | SG1 |
| 70 | Neches              | Texas       | <i>japonica</i> | SG2 |
| 71 | Epagri              | Brazil      | <i>indica</i>   | SG3 |
| 72 | Cheniere            | Louisiana   | <i>japonica</i> | SG1 |
| 73 | Jazzman-2           | Louisiana   | <i>japonica</i> | SG3 |
| 74 | Arang               | Indonesia   | <i>indica</i>   | SG3 |
| 75 | Ecrevisse           | Louisiana   | <i>japonica</i> | SG1 |
| 76 | Dellmati            | Louisiana   | <i>japonica</i> | SG5 |
| 77 | Smooth Zenith       | Texas       | <i>japonica</i> | SG2 |
| 78 | Carolina Gold       | Texas       | <i>japonica</i> | SG1 |
| 79 | Damodar             | India       | <i>indica</i>   | SG5 |
| 80 | Bengal              | Louisiana   | <i>japonica</i> | SG2 |
| 81 | Jes                 | Arkansas    | <i>indica</i>   | SG5 |
| 82 | Kalia               | Bangladesh  | <i>indica</i>   | SG2 |
| 83 | Toro                | Louisiana   | <i>japonica</i> | SG3 |
| 84 | Della 2             | Louisiana   | <i>japonica</i> | SG3 |
| 85 | Century Patna       | Texas       | <i>japonica</i> | SG1 |
| 86 | MS-1995-15          | Mississippi | <i>japonica</i> | SG2 |
| 87 | Chengri             | Bangladesh  | <i>indica</i>   | SG2 |
| 88 | CL152               | Louisiana   | <i>japonica</i> | SG5 |
| 89 | CL162               | Louisiana   | <i>japonica</i> | SG3 |
| 90 | SLO16               | India       | <i>japonica</i> | SG2 |
| 91 | Nato                | Louisiana   | <i>japonica</i> | SG1 |
| 92 | Rexark              | Arkansas    | <i>japonica</i> | SG3 |
| 93 | MS-1996-9           | Mississippi | <i>japonica</i> | SG1 |
| 94 | Glutinous Selection | Texas       | <i>japonica</i> | SG3 |

|     |                  |             |                 |                |
|-----|------------------|-------------|-----------------|----------------|
| 95  | Saturn Rogue     | Arkansas    | <i>japonica</i> | SG3            |
| 96  | Azucena          | Philippines | <i>indica</i>   | SG3            |
| 97  | V20B             | Philippines | <i>indica</i>   | SG2            |
| 98  | Langmanbi        | India       | <i>indica</i>   | SG4            |
| 99  | Milagrosa        | Philippines | <i>indica</i>   | SG5            |
| 100 | Zhenshan 97      | China       | <i>indica</i>   | SG2            |
| 101 | CSR11            | India       | <i>indica</i>   | Not Classified |
| 102 | R 50             | Philippines | <i>indica</i>   | SG5            |
| 103 | Mars             | Arkansas    | <i>japonica</i> | SG5            |
| 104 | Vandana          | India       | <i>indica</i>   | SG3            |
| 105 | Gu Ze            | Japan       | <i>japonica</i> | SG3            |
| 106 | Ning Yang Keng   | Taiwan      | <i>indica</i>   | SG3            |
| 107 | IR 50            | Philippines | <i>indica</i>   | SG5            |
| 108 | Kasalath         | India       | <i>indica</i>   | SG5            |
| 109 | Stormproof       | Arkansas    | <i>japonica</i> | SG5            |
| 110 | R-54             | Missouri    | <i>japonica</i> | SG3            |
| 111 | Starbonnet       | Arkansas    | <i>japonica</i> | SG2            |
| 112 | Sarioo50         | Arkansas    | <i>japonica</i> | SG1            |
| 113 | B573-A4-20-6     | Texas       | <i>japonica</i> | SG1            |
| 114 | IR 8             | Philippines | <i>indica</i>   | SG3            |
| 115 | M202             | California  | <i>japonica</i> | SG1            |
| 116 | Zenith           | Arkansas    | <i>japonica</i> | SG5            |
| 117 | R-27             | Missouri    | <i>japonica</i> | SG3            |
| 118 | Gold Nato        | Arkansas    | <i>japonica</i> | SG2            |
| 119 | Panidhan II      | India       | <i>indica</i>   | SG5            |
| 120 | Naylamp          | Peru        | <i>indica</i>   | SG5            |
| 121 | Azaurel          | Venezuela   | <i>indica</i>   | SG4            |
| 122 | IR 64            | Philippines | <i>indica</i>   | SG2            |
| 123 | Koshihikari      | Japan       | <i>japonica</i> | SG3            |
| 124 | Arkansas Fortuna | Arkansas    | <i>japonica</i> | SG3            |
| 125 | Melrose          | Texas       | <i>japonica</i> | SG3            |
| 126 | Texmont          | Texas       | <i>japonica</i> | SG2            |
| 127 | Kranti           | India       | <i>indica</i>   | SG4            |
| 128 | TP 49            | Texas       | <i>japonica</i> | SG2            |
| 129 | Jinheung         | South Korea | <i>japonica</i> | SG1            |
| 130 | Teqing           | China       | <i>indica</i>   | SG3            |
| 131 | Taichung 65      | Taiwan      | <i>japonica</i> | SG3            |
| 132 | Arkrose          | Arkansas    | <i>japonica</i> | SG1            |
| 133 | Dixiebelle       | Texas       | <i>japonica</i> | SG5            |
| 134 | Millie           | Arkansas    | <i>japonica</i> | SG5            |
| 135 | Kirak            | India       | <i>indica</i>   | SG2            |
| 136 | Daido            | Taiwan      | <i>indica</i>   | SG2            |
| 137 | Nerretto         | Italy       | <i>japonica</i> | SG1            |
| 138 | Lemont           | Texas       | <i>japonica</i> | SG5            |
| 139 | Quilloa 66304    | China       | <i>indica</i>   | SG2            |
| 140 | PSRR-1           | Louisiana   | <i>indica</i>   | SG2            |
| 141 | Kokubelle        | California  | <i>japonica</i> | SG2            |
| 142 | Dellmont         | Texas       | <i>japonica</i> | SG2            |
| 143 | Chambal          | India       | <i>indica</i>   | Not Classified |

|     |                    |             |                 |                |
|-----|--------------------|-------------|-----------------|----------------|
| 144 | Chung yuen         | China       | <i>indica</i>   | Not Classified |
| 145 | Bala               | India       | <i>indica</i>   | Not Classified |
| 146 | Co39               | Philippines | <i>indica</i>   | Not Classified |
| 147 | IRGC1244           | Philippines | <i>indica</i>   | SG2            |
| 148 | Newrex             | Texas       | <i>japonica</i> | SG5            |
| 149 | Bluebonnet         | Texas       | <i>japonica</i> | SG5            |
| 150 | RD                 | Texas       | <i>japonica</i> | SG2            |
| 151 | Kanchan            | India       | <i>indica</i>   | Not Classified |
| 152 | San Tou Thou       | China       | <i>indica</i>   | Not Classified |
| 153 | Pratao Tipo Guedes | Philippines | <i>indica</i>   | Not Classified |
| 154 | Swarna             | India       | <i>indica</i>   | SG5            |
| 155 | IRGC32567          | Philippines | <i>indica</i>   | SG5            |
| 156 | W149               | Louisiana   | <i>japonica</i> | SG2            |
| 157 | Orion              | Arkansas    | <i>japonica</i> | SG5            |
| 158 | IR4432-52-6-4      | Philippines | <i>indica</i>   | SG2            |
| 159 | Perum karuppan     | Srilanka    | <i>indica</i>   | Not Classified |
| 160 | Dholamon 560       | Bangladesh  | <i>indica</i>   | SG2            |
| 161 | Kitaake            | Japan       | <i>japonica</i> | SG5            |
| 162 | Taipe 309          | Japan       | <i>japonica</i> | Not Classified |
| 163 | Hill Long Grain    | Texas       | <i>japonica</i> | SG2            |
| 164 | Adair              | Arkansas    | <i>japonica</i> | SG2            |
| 165 | Bharathy           | India       | <i>indica</i>   | Not Classified |
| 166 | H4                 | Louisiana   | <i>japonica</i> | SG1            |
| 167 | IARI 5823          | India       | <i>indica</i>   | SG5            |
| 168 | Hayamasari         | Japan       | <i>japonica</i> | Not Classified |
| 169 | Early Prolific     | Arkansas    | <i>japonica</i> | SG3            |
| 170 | Brazos             | Texas       | <i>japonica</i> | SG5            |
| 171 | LaGrue             | Arkansas    | <i>japonica</i> | SG2            |
| 172 | M-204              | California  | <i>japonica</i> | SG2            |
| 173 | Fatehpur 3         | Pakistan    | <i>indica</i>   | SG2            |
| 174 | Delitus            | Louisiana   | <i>japonica</i> | SG1            |
| 175 | Italica Livorno    | Italy       | <i>japonica</i> | SG2            |
| 176 | Hill medium        | Texas       | <i>japonica</i> | SG3            |
| 177 | Prelude            | Arkansas    | <i>japonica</i> | SG2            |
| 178 | Jackson            | Texas       | <i>japonica</i> | SG2            |
| 179 | WC10380            | Philippines | <i>indica</i>   | Not Classified |
| 180 | CT-329             | India       | <i>indica</i>   | SG2            |
| 181 | KN-1-B-361-1-8-67  | Indonesia   | <i>indica</i>   | SG4            |



**Table S6.** List of primers used in the gene expression profiling by qRT-PCR.

| Gene           | Forward Primer       | Reverse Primer       |
|----------------|----------------------|----------------------|
| LOC_Os04g50090 | CGCCAGATGAACGAGTACCT | TTCACGAAATCAATGGCGCC |
| LOC_Os08g23440 | GCAATTACGATTGGACGCCC | GACTGCCATACACCTGCCAT |
| LOC_Os09g32972 | TACCTTAGCCCCGACCTCAA | CGCTTGATGTGCTGTTCCAC |
| LOC_Os10g35230 | AGCTCGGCTGCATACCAAAT | GGGCAGTCACCTCCATCATC |
| LOC_Os03g25480 | TCAATGATCGGCAAAGGGCT | CCACCCCTGGATCAAGCATT |
| LOC_Os08g25390 | CCCTGGTACCATGATCTGCC | CACCAGCCATTCCAGTTCCT |
| LOC_Os09g38340 | CGCAGAATCCCACCAATCCA | CTCCGCATCTGGATTTGGGT |
| LOC_Os04g58160 | TCTGCTTCATCACCTGCTGG | ATCACCAGCGTGCTGTACTT |

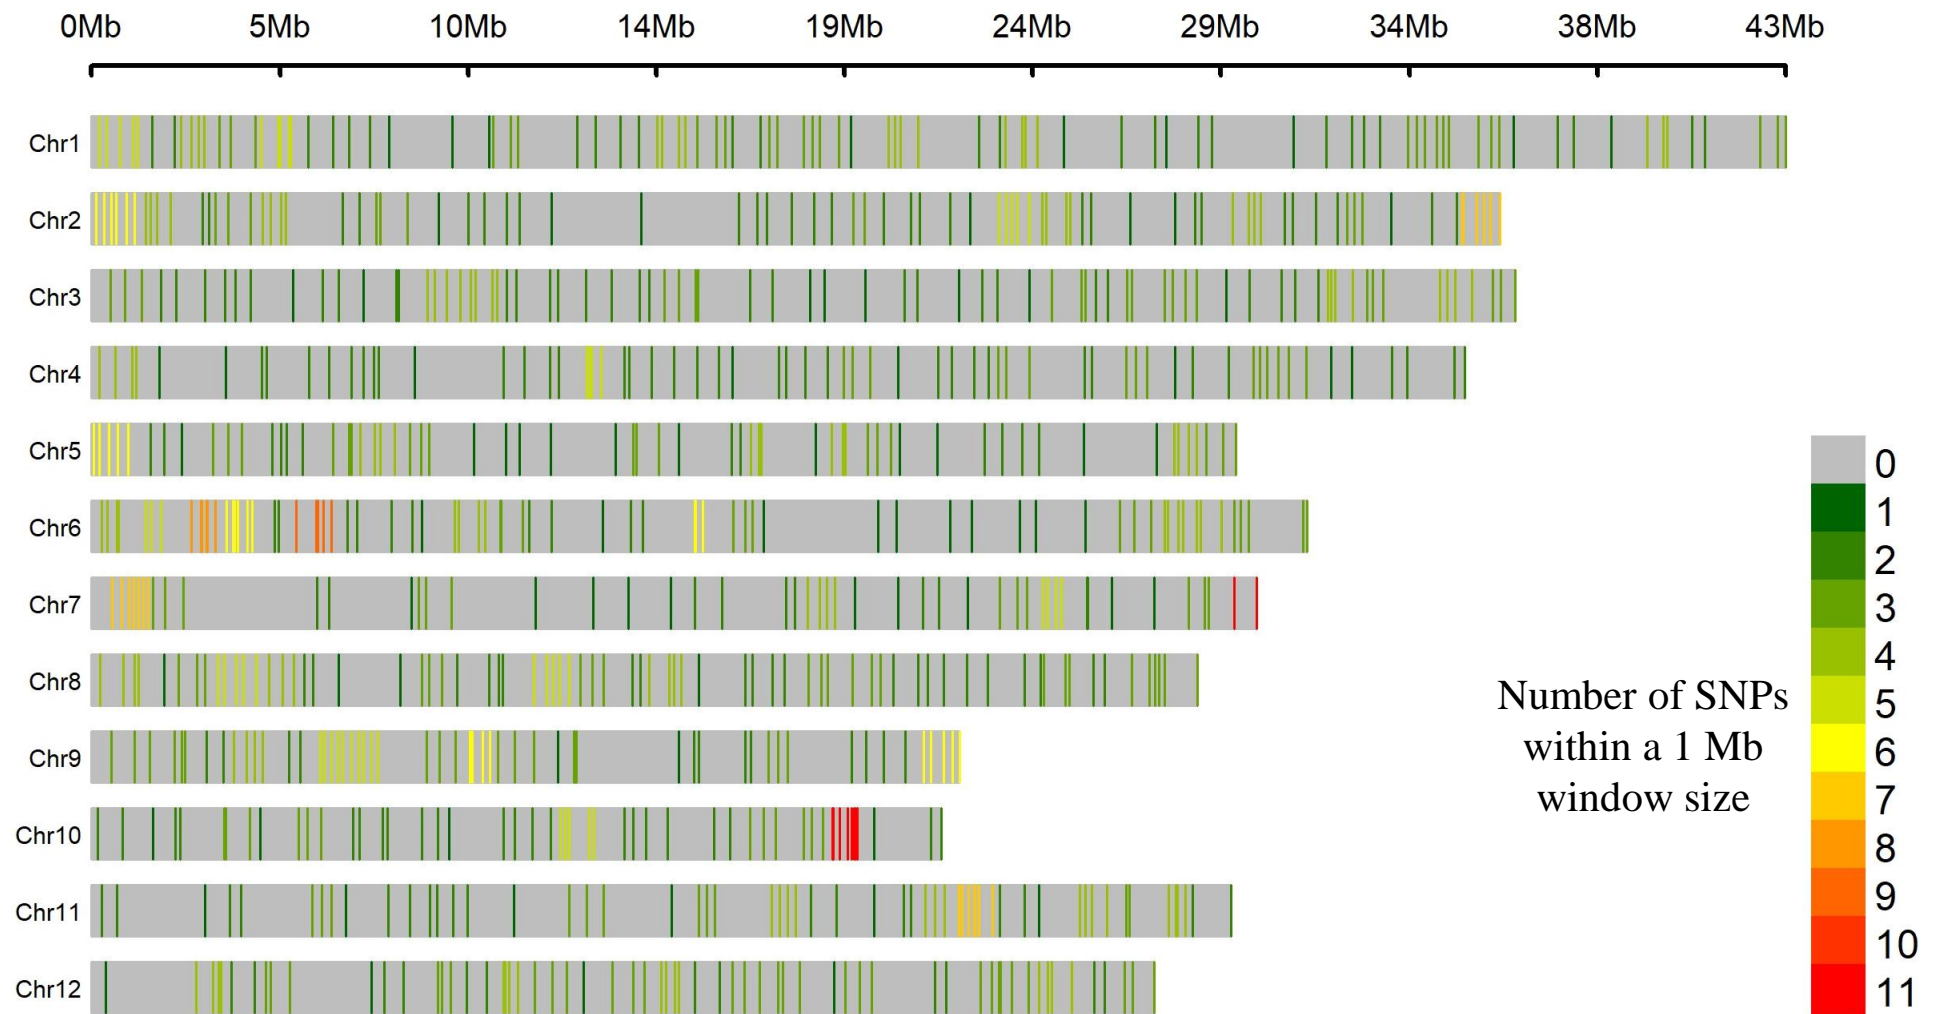

**Figure S1.** Linkage map of rice showing the number of SNPs within a 1Mb window size on each chromosome.
